# Supplementary material
Source: Springer Nature journal article supplement (https://www.springermedizin.de/resource/supplementary/13058_2011_2750_MOESM9_ESM.pdf/9702646)

**a**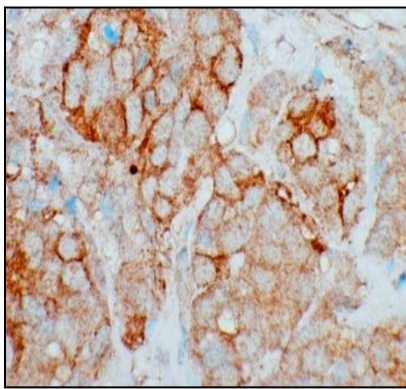**p-IRS1 Y612**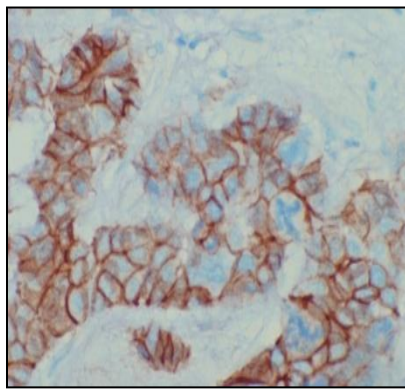**p-IGF-IR Y1316**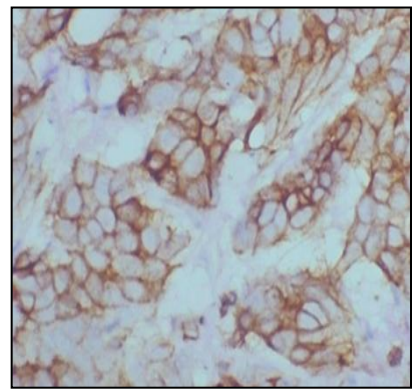**total erbB3**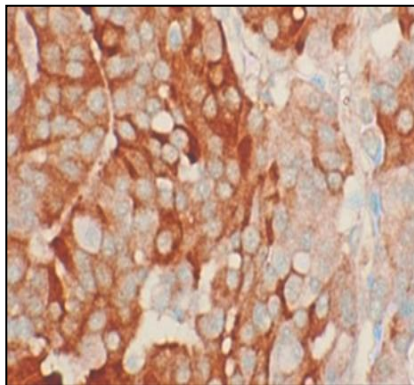**p-AKT S473**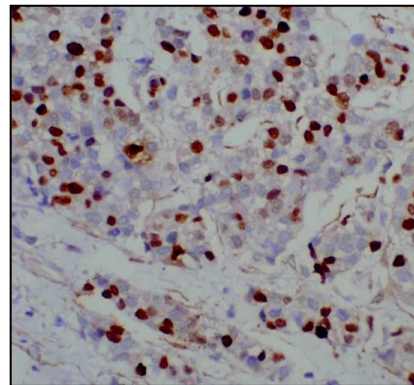**Ki67****b**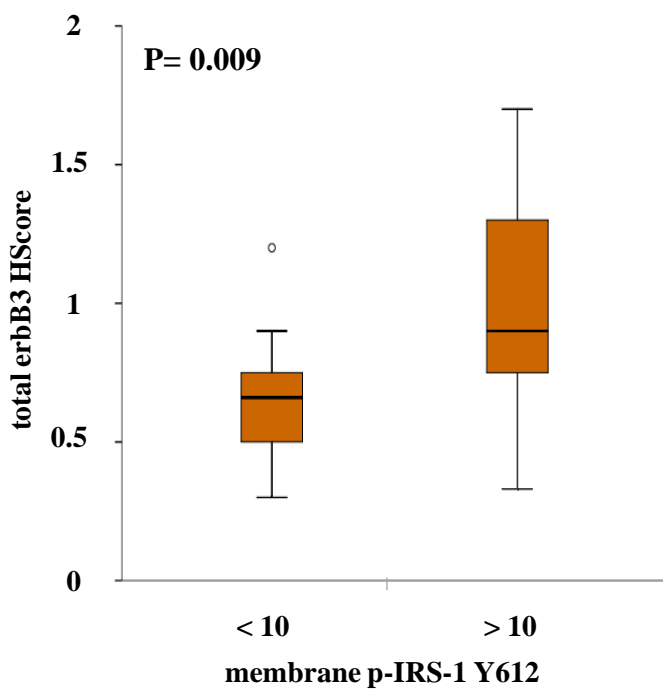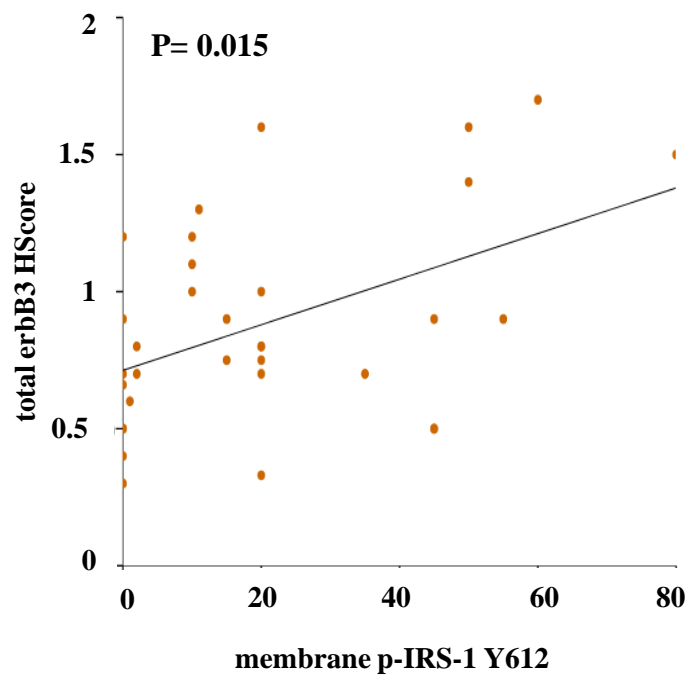

Supplement: MOESM9 [file 9702646]
